# Supplementary material for: Ultra-low concentration protein detection based on phenylalanine–Pd/SWCNT as a high sensitivity nanoreceptor
Source: Royal Society of Chemistry journal article supplement (doi:10.1039/c9ra09243a), 2020-01-01
Supplement: c9ra09243a1.pdf [file c9ra09243a1.pdf]

**Table 1.** The binding free energies of the purposed binding to HAS. The binding free energies (kcal.mol<sup>-1</sup>) and Inhibition Constant of the biosensor-HAS complex were estimated by the scoring function of AUTODOCK.

| Number | Binding site | $\Delta G_{\text{binding}}$ | $\Delta G_{\text{nes}}$ | $\Delta G_{\text{es}}$ | $\Delta G_{\text{tor}}$ | $K_i$ |
|--------|--------------|-----------------------------|-------------------------|------------------------|-------------------------|-------|
| 1      | IIA          | -10.05                      | -11.70                  | -0.27                  | 1.92                    | 42.68 |
| 2      | IB           | -10.05                      | -11.71                  | -0.27                  | 1.92                    | 42.81 |

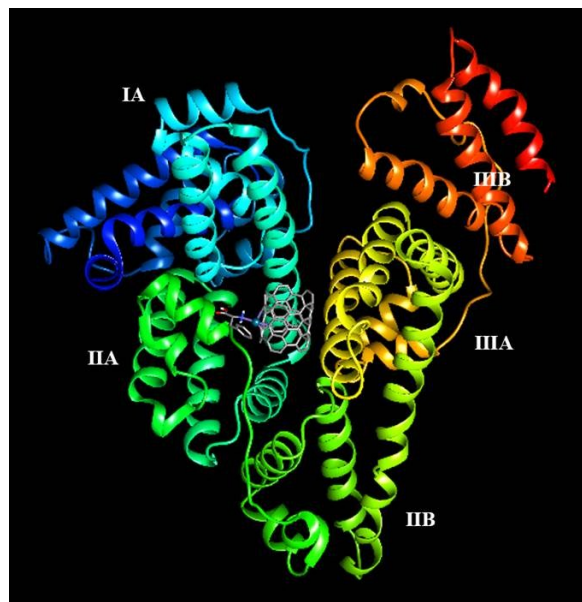

1

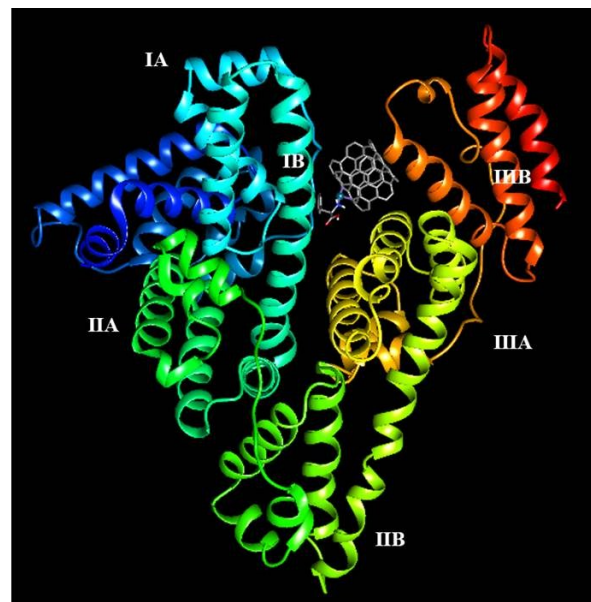

2

**Table 2.** Hydrogen bonding parameters

| Hydrogen bonding interaction | Bond length (Å) | Bond angles (°) |
|------------------------------|-----------------|-----------------|
| Phe-Pd/SWCNT ... Glu292      | 2.76            | 127             |
| Phe-Pd/SWCNT ... Lys190      | 2.45            | 145             |
| Phe-Pd/SWCNT ... Glu425      | 2.47            | 136             |
